# Supplementary material for: Novel Freshwater Ascomycetes from Spain
Source: MDPI journal article supplement (doi:10.3390/jof8080849), 2022-08-14
Supplement: s1 [file s1]

**Table S1.** Strains and sequence accession numbers included in this study.

| Taxon                               | Strain number <sup>1</sup>                                    | GenBank accession number |                 |             |             |                 |
|-------------------------------------|---------------------------------------------------------------|--------------------------|-----------------|-------------|-------------|-----------------|
|                                     |                                                               | LSU <sup>3</sup>         | ITS             | <i>tub2</i> | <i>rpb2</i> | <i>tef1</i>     |
| <i>Allocurbitaria botulispora</i>   | CBS 234.92 <sup>T</sup>                                       | LN907416                 | LT592932        | LT593001    | LT593070    |                 |
| <i>Amniculicola aquatica</i>        | MFLUCC 16-1123 <sup>T</sup>                                   | MK106096                 |                 |             |             | MK109800        |
| <i>A. guttulata</i>                 | MFLUCC 18-1038 <sup>T</sup>                                   | MN913712                 | MT627726        |             |             | MT954389        |
| <i>A. immersa</i>                   | CBS 123083                                                    | NG_056964                |                 |             |             | GU456273        |
| <i>A. lignicola</i>                 | CBS 123094 <sup>T</sup>                                       | MH874798                 |                 |             |             | GU456278        |
| <i>A. longissima</i>                | CB L22                                                        | GU266240                 | AY204596        |             |             |                 |
| <i>A. longissima</i>                | CCM-F11791                                                    | AY204594                 | AY204597        |             |             |                 |
| <i>A. microspora</i>                | <b>FMR 17946<sup>2</sup></b><br><b>CBS 148919<sup>T</sup></b> | <b>ON008450</b>          | <b>ON006460</b> |             |             | <b>ON101726</b> |
| <i>A. parva</i>                     | CBS 123092 <sup>T</sup>                                       | FJ795497                 | MH863272        |             |             | GU349065        |
| <i>Arthopyrenia salicis</i>         | CBS 368.94                                                    | KF443410                 |                 |             |             |                 |
| <i>Chaetomella endophytica</i>      | SDBR-CMU300 <sup>T</sup>                                      | MG406984                 | MG406985        |             |             |                 |
| <i>C. raphigera</i>                 | BPI 843541 <sup>T</sup>                                       | AY487077                 | AY487076        |             |             |                 |
| <i>C. raphigera</i>                 | CBS 130.64                                                    | MH870019                 | MH858390        |             |             |                 |
| <i>C. raphigera</i>                 | BPI 843551                                                    | AY487086                 | AY487085        |             |             |                 |
| <i>C. zambiensis</i>                | CBS 137978 <sup>T</sup>                                       | MH878619                 | NR_156280       |             |             |                 |
| <i>Cucurbitaria berberidis</i>      | CBS 142401                                                    | MF795756                 | MF795756        | MF795886    | MF795798    |                 |
| <i>C. berberidis</i>                | CBS 130007 <sup>T</sup>                                       | KC506793                 | LT717673        | LT717676    | LT854936    |                 |
| <i>Elongatopedicellata aquatica</i> | <b>FMR 17834</b><br><b>CBS 148920<sup>T</sup></b>             | <b>ON008448</b>          |                 |             |             |                 |
| <i>E. lignicola</i>                 | MFLUCC 15-0642 <sup>T</sup>                                   | KX421368                 |                 |             |             |                 |
| <i>Flabellascoma aquaticum</i>      | KUMCC 15-0258 <sup>T</sup>                                    | NG_068307                | NR_166305       |             | MN328895    | MN328898        |

|                                        |                              |           |           |          |          |          |
|----------------------------------------|------------------------------|-----------|-----------|----------|----------|----------|
| <i>F. fusiforme</i>                    | MFLUCC 18-1019               | MT627660  | MT627741  |          | MT878452 | MT95440  |
| <i>Fouskomenomyces cupreorufescens</i> | A20 <sup>T</sup>             | AY616236  | AY616232  |          |          |          |
| <i>F. mimiticus</i>                    | FMR 16958 <sup>T</sup>       | LR824585  | LR824586  |          |          | LR824584 |
| <i>Leptosphaeria dolium</i>            | CBS 125979                   | JF740283  | JF740208  |          |          |          |
| <i>L. dolium</i>                       | CBS 505.75 <sup>T</sup>      | GQ387576  | JF740205  |          |          | GU349069 |
| <i>Lophiostoma crenatum</i>            | CBS 629.86 <sup>T</sup>      | DQ678069  |           |          | KT216552 | DQ677912 |
| <i>L. macrostomum</i>                  | KT 635                       |           |           |          | JN993484 |          |
| <i>L. semiliberum</i>                  | KT 828                       | AB619014  | JN942970  |          | JQ012895 | LC001759 |
| <i>Murispora aquatica</i>              | MFLU 19-0990 <sup>T</sup>    | MN325075  | MN325085  |          |          | MN337969 |
| <i>M. cicognanii</i>                   | MFLUCC 14-0953 <sup>T</sup>  | NG_059609 | NR_155381 |          |          | MK109804 |
| <i>M. fagicola</i>                     | MFLUCC 13-0600 <sup>T</sup>  | NG_060797 | NR_155379 |          |          | KT709188 |
| <i>M. fissilispora</i>                 | FMR 17151 <sup>T</sup>       | LR824597  | LR824594  |          |          | LR824591 |
| <i>M. haswksworthii</i>                | MFLUCC 14-0918 <sup>T</sup>  | KT709180  | NR_138414 |          |          | KT709192 |
| <i>M. medicaginicola</i>               | MFLUCC 13-0762 <sup>T</sup>  | NG_059609 | NR_155380 |          |          | KT709191 |
| <i>M. rubicunda</i>                    | IFRD 2017 <sup>T</sup>       | FJ795507  |           |          |          | GU456289 |
| <i>Neocucurbitaria acerina</i>         | MFLUCC 16-1450 <sup>T</sup>  | NG_059784 | NR_154254 |          |          |          |
| <i>N. aquatica</i>                     | CBS 297.74 <sup>T</sup>      | EU754177  | LT623221  | LT623238 | LT623278 |          |
| <i>N. quercina</i>                     | CBS 115095 <sup>T</sup>      | GQ387619  | LT623220  | LT623237 | LT623277 |          |
| <i>N. unguis hominis</i>               | CBS 111112                   | GQ387623  | LT623222  | LT623239 | LT623279 |          |
| <i>N. unguis hominis</i>               | UTHSC: DI16-213 <sup>T</sup> |           | LT717672  | LT717675 | LT717682 |          |
| <i>Neopyrenochaeta acicola</i>         | CBS 812.95 <sup>T</sup>      | GQ387602  | LT623218  | LT623232 | LT623271 |          |
| <i>N. annellidica</i>                  | MFLU 11-1105 <sup>T</sup>    | MT183502  | MT185538  |          |          |          |
| <i>N. inflorescentiae</i>              | CBS 119222 <sup>T</sup>      | EU552153  | EU552153  | LT623233 | LT623272 |          |

|                                       |                                                   |                 |                 |          |                 |                 |
|---------------------------------------|---------------------------------------------------|-----------------|-----------------|----------|-----------------|-----------------|
| <i>N. thailandica</i>                 | MFLU 17-1461 <sup>T</sup>                         | NG_068716       | MT214376        |          | MT235825        |                 |
| <i>Neovaginatisspora aquadulcis</i>   | <b>FMR 18914</b><br><b>CBS 148921<sup>T</sup></b> | <b>ON008451</b> | <b>ON006463</b> |          | <b>ON101724</b> | <b>ON101727</b> |
| <i>N. clematidis</i>                  | MFLU 17-2149 <sup>T</sup>                         | NG_073846       | MT310606        |          |                 | MT394738        |
| <i>N. fuckelii</i>                    | SICAUCC 20-0008                                   | MT427734        | MT427731        | MT441924 |                 | MT441923        |
| <i>Pilidium acerinum</i>              | CBS 736.68 <sup>T</sup>                           | MH870939        | NR_119500       |          |                 |                 |
| <i>P. anglicum</i>                    | CBS 143402 <sup>T</sup>                           | NG_058522       | NR_156670       |          |                 |                 |
| <i>P. cuprensens</i>                  | <b>FMR 17839</b><br><b>CBS 148922<sup>T</sup></b> | <b>ON008449</b> | <b>ON006459</b> |          |                 |                 |
| <i>P. eucalyptorum</i>                | CPC:26594 <sup>T</sup>                            | NG_059618       | NR_145311       |          |                 |                 |
| <i>P. lythri</i>                      | BPI 1107275 <sup>T</sup>                          | AY487095        | AY487094        |          |                 |                 |
| <i>P. lythri</i>                      | BJ-4                                              | MH322002        | MH322003        |          |                 |                 |
| <i>P. novae zelandiae</i>             | CPC:35872 <sup>T</sup>                            | NG_068665       | NR_165928       |          |                 |                 |
| <i>P. pseudoconcaum</i>               | CBS 136433 <sup>T</sup>                           | NG_058050       | NR_137128       |          |                 |                 |
| <i>P. septatum</i>                    | BCC 79016 <sup>T</sup>                            | NG_060185       | NR_156616       |          |                 |                 |
| <i>Platystomum scabridisporum</i>     | BC 2235                                           | GQ925844        |                 |          | GU479830        | GU479857        |
| <i>P. scabridisporum</i>              | BC 2236                                           | GQ925845        |                 |          | GU479829        | GU479856        |
| <i>Pleospora herbarum</i>             | CBS 191.86 <sup>T</sup>                           | JX681120        | NR_111243       |          | KC584471        |                 |
| <i>P. typhicola</i>                   | CBS 132.69                                        | JF740325        |                 | KT389843 | KC584505        |                 |
| <i>Pseudolophiostoma obtusisporum</i> | KT 2838 <sup>T</sup>                              | LC312548        | LC312518        |          |                 | LC312576        |
| <i>P. tropicum</i>                    | KT 3134 <sup>T</sup>                              | LC312551        | LC312522        |          | LC312609        | LC312580        |
| <i>Pseudopyrenochaeta lycopersici</i> | CBS 306.65 <sup>T</sup>                           | EU754205        | NR_103581       | LT717674 | LT717680        |                 |
| <i>P. terrestris</i>                  | CBS 282.72 <sup>T</sup>                           | LT623216        | LT623228        | LT623246 | LT623287        |                 |
| <i>Pseudosigmoidea alnicola</i>       | CBS 145034 <sup>T</sup>                           | NG_070465       | NR_163379       |          |                 |                 |

|                                   |                                                   |                 |                 |                 |                 |
|-----------------------------------|---------------------------------------------------|-----------------|-----------------|-----------------|-----------------|
| <i>P. excentricum</i>             | CBS 469.95 <sup>T</sup>                           | MH874174        | MH862538        |                 |                 |
| <i>P. ibarakiensis</i>            | NBRC 107891 <sup>T</sup>                          | LC146759        | LC146758        |                 |                 |
| <i>P. robusta</i>                 | <b>FMR 17416</b>                                  | <b>ON008447</b> | <b>ON006458</b> |                 |                 |
| <i>Pyrenochaeta nobilis</i>       | CBS 407.76 <sup>T</sup>                           | EU754206        | EU930011        | KT389845        | LT623276        |
| <i>Pyrenochaetopsis americana</i> | UTHSC: DI16-225 <sup>T</sup>                      | LN907368        | LT592912        | LT592981        | LT593050        |
| <i>P. aquatica</i>                | FMR 17327                                         | LR216649        | LR216648        | LR897788        | LR216647        |
| <i>P. botulispora</i>             | UTHSC: DI16-298                                   | LN907432        | LT592941        | LT593010        | LT593080        |
| <i>P. chromolaenae</i>            | MFLU 17-1446 <sup>T</sup>                         | MT214469        | NR_168876       |                 | MT235824        |
| <i>P. confluens</i>               | CBS 142459 <sup>T</sup>                           | LN907446        | LT592950        | LT593019        | LT593089        |
| <i>P. cylindrispora</i>           | <b>FMR 18801</b><br><b>CBS 148924</b>             | <b>ON008446</b> | <b>ON006461</b> | <b>ON101729</b> | <b>ON101725</b> |
| <i>P. decipiens</i>               | CBS 343.85 <sup>T</sup>                           | GQ387624        | LT623223        | LT623240        | LT623280        |
| <i>P. globosa</i>                 | UTHSC: DI16-275 <sup>T</sup>                      | LN907418        | LT592934        | LT593003        | LT593072        |
| <i>P. indica</i>                  | CBS 124454 <sup>T</sup>                           | GQ387626        | LT623224        | LT623241        | LT623281        |
| <i>P. kuksensis</i>               | CBS 146534                                        | MT371397        | NR_172539       | MT372662        | MT372656        |
| <i>P. leptospora</i>              | CBS 101635 <sup>T</sup>                           | GQ387627        | JF740262        | LT623242        | LT623282        |
| <i>P. microspora</i>              | UTHSC: DI16-198                                   | LN907341        | LT592899        | LT592968        | LT593037        |
| <i>P. paucisetosa</i>             | UTHSC: DI16-193 <sup>T</sup>                      | LN907336        | LT592897        | LT592966        | LT593035        |
| <i>P. perfecta</i>                | <b>FMR 18913</b><br><b>CBS 148923<sup>T</sup></b> | <b>ON008445</b> | <b>ON006462</b> | <b>ON101728</b> | <b>ON168928</b> |
| <i>P. poae</i>                    | CBS 136769 <sup>T</sup>                           | KJ869175        | KJ869117        | KJ869243        | LT623286        |
| <i>P. setosissima</i>             | CBS 119739 <sup>T</sup>                           | GQ387632        | LT623227        | LT623245        | LT623285        |
| <i>P. sinensis</i>                | LC12199                                           | MK348581        | MK348586        | MK348221        | MK355077        |
| <i>P. tabarestanensis</i>         | CBS 139506                                        | KF803343        | KF730241        | KX789523        |                 |
| <i>P. terricola</i>               | HGUP1802                                          | MH697393        | MH697394        | MH697392        | MH697395        |

|                                  |                              |           |           |          |          |          |
|----------------------------------|------------------------------|-----------|-----------|----------|----------|----------|
| <i>P. rajhradensis</i>           | CBS 146846 <sup>T</sup>      | MT853182  | MT853115  | MT857726 | MT857727 |          |
| <i>P. uberiformis</i>            | UTHSC: DI16-277 <sup>T</sup> | LN907420  | LT592935  | LT593004 | LT593074 |          |
| <i>Roussoella arundinacea</i>    | CBS 146088                   | MT223928  |           |          |          |          |
| <i>R. doimaesalongensis</i>      | MFLU 14-0584                 | NG_068241 |           |          |          |          |
| <i>R. euonymi</i>                | CBS 143426 <sup>T</sup>      | MH107961  |           |          |          |          |
| <i>R. guttulata</i>              | MFLU 20-0102 <sup>T</sup>    | MT734818  |           |          |          |          |
| <i>R. hysteroidea</i>            | CBS 546.94 <sup>T</sup>      | MH874129  |           |          |          |          |
| <i>R. intermedia</i>             | CBS 170.96 <sup>T</sup>      | KF443382  |           |          |          |          |
| <i>R. kunmingensis</i>           | HKAS 101773 <sup>T</sup>     | MH453487  |           |          |          |          |
| <i>R. margidorensis</i>          | MUT 5329                     | MN556322  |           |          |          |          |
| <i>R. mediterranea</i>           | MUTITA 5369 <sup>T</sup>     | MN556324  |           |          |          |          |
| <i>R. mexicana</i>               | NTU 18-099-3                 | MT071282  |           |          |          |          |
| <i>R. mukdahanensis</i>          | HKAS 101766                  | MH453485  |           |          |          |          |
| <i>R. pustulans</i>              | KT1709 <sup>T</sup>          | AB524623  |           |          |          |          |
| <i>R. solani</i>                 | KT 3265 <sup>T</sup>         | LC195210  |           |          |          |          |
| <i>Sporidesmium australiense</i> | HKU 10833                    | DQ408554  |           |          |          |          |
| <i>Sympoventuria capensis</i>    | CBS 120136 <sup>T</sup>      | MH874632  | NR_121323 |          |          |          |
| <i>S. melaleuca</i>              | CBS 143407 <sup>T</sup>      | NG_058520 | NR_156668 |          |          |          |
| <i>Torula herbarum</i>           | CBS 379.58                   | KF443383  |           |          |          |          |
| <i>T. herbarum</i>               | CBS 111855                   | KF443386  |           |          |          |          |
| <i>Tricladium splendens</i>      | CCM-F 16599                  | GQ477333  | AY204635  |          |          |          |
| <i>T. splendens</i>              | CBS 234.46 <sup>T</sup>      | MH867695  | MH856171  |          |          |          |
| <i>Vaginatispora amygdali</i>    | KT 2248 <sup>T</sup>         | LC312553  | LC312524  | LC312640 | LC312611 | LC312582 |
| <i>V. nypae</i>                  | MFLUCC 18-1543 <sup>T</sup>  | NG_066313 | NR_163340 |          | MK434877 | MK360091 |
| <i>V. scabrispora</i>            | KT 2443 <sup>T</sup>         | LC312554  | LC312525  | LC312641 | LC312612 | LC312583 |

|                                     |                         |          |           |
|-------------------------------------|-------------------------|----------|-----------|
| <b><i>Vargamyces aquaticus</i></b>  | CBS 636.91 <sup>T</sup> | KY853539 | NR_154471 |
| <b><i>V. aquaticus</i></b>          | FMR 11587               | KY853538 | KY853475  |
| <b><i>Venturia inaequalis</i></b>   | CBS 814.69 <sup>T</sup> | MH871214 | MH859439  |
| <b><i>V. pyrina</i></b>             | CBS 120825 <sup>T</sup> | MH874652 | EU035468  |
| <b><i>Xeropilidium dennisii</i></b> | TFC 201986 <sup>T</sup> |          | NR_171225 |
| <b><i>X. dennisii</i></b>           | KL159                   | KX090807 |           |

<sup>1</sup>A Hermann Volgmayr; BC:; **BCC**: BIOTEC Culture Collection; **CBS**: Culture collection of the Westerdijk Biodiversity Institute, Utrecht, The Netherlands; **CCM**: Czech Collections of Microorganisms; **CPC**: Culture Collection of Pedro Crous; **FMR**: Facultat de Medicina, Reus, Spain; **HGUP**: Corresponding author's personal collection deposited in laboratory, housed at Guizhou, China; **HKAS**: Cryptogamic Herbarium of Kunming Institute of Botany, Chinese Academy of Sciences; **IFRD**: Culture Collection, International Fungal Research & Development Centre, Chinese Academy of Forestry, Kunming, China; **KT**: Kazuaki Tanaka; **KUMCC**: Kunming Institute of Botany Culture Collection; **LC**: Corresponding author's personal collection deposited in laboratory, housed at CAS, China; **MFLU (MFLUCC)**: Mae Fah Luang University Herbarium, Chiang Rai, Thailand; **MUT, MUTITA**: Mycoteca Universitatis Taurinensis; **NBRC**: NITE Biological Resource Center; **TFC**: Tartu Fungal Culture Collection; **UTHSC**, Fungus Testing Laboratory at the University of Texas Health Science Center, San Antonio, Texas, USA.

<sup>2</sup>Strains studied by us are indicated in **bold**.

<sup>3</sup>ITS: internal transcribed spacer region 1 and 2 including 5.8S nrDNA; LSU: large subunit of the nrRNA gene; *rpb2*: RNA polymerase II second subunit; *tub2*:  $\beta$ -tubulin; *tef* 1: translation elongation factor.

<sup>T</sup>Ex-type strain.
